# Supplementary material for: Pro-Inflammatory Cytokines but Not Endotoxin-Related Parameters Associate with Disease Severity in Patients with NAFLD
Source: PLoS One. 2016 Dec 19;11(12):e0166048. doi: 10.1371/journal.pone.0166048 (PMC5167229; doi:10.1371/journal.pone.0166048)
Supplement: S4 Fig — (DOCX) [file pone.0166048.s009.docx]

**S4:**

**Pro-inflammatory cytokines but not endotoxin-related parameters associate with disease severity in patients with NAFLD**

**Johannie du Plessis1**, **Hannelie Korf1&2, Jos van Pelt1,Petra Windmolders1**, **Ingrid Vander Elst1, An Verrijken3**, **Guy Hubens4**, **Luc Van Gaal5**, **David Cassiman1,6**, **Frederik Nevens1,6**, **Sven Francque5**, **Schalk van der Merwe1,6**

1Laboratory of Hepatology, KU Leuven, Leuven, Belgium

2Translational Research Center for Gastrointestinal Disorders (TARGID), Department of Clinical and Experimental Medicine, KU Leuven, Leuven, Belgium

3Department of Endocrinology, Diabetology and Metabolism, Antwerp University Hospital,

University of Antwerp, Antwerp, Belgium.

4Department of Abdominal Surgery, Antwerp University Hospital, University of Antwerp, Antwerp, Belgium

5Department of Gastroenterology and Hepatology, Antwerp University Hospital, University of Antwerp, Antwerp, Belgium.

6 Department of Internal Medicine, Division of Liver and biliopancreatic disorders, KU Leuven, Leuven, Belgium







**B**

**A**

**S4 Fig:** Correlation between plasma IL6 and waist circumference and HOMA-IR in NAFLD subgroups (Fig A and B).
